# Supplementary material for: Structural and computational insights into the SARS-CoV-2 Omicron RBD-ACE2 interaction
Source: Research Square preprint supplement (doi:10.21203/rs.3.rs-1225637/v1), 2022-01-07
Supplement: Supplementary file 1 [file 9b0b35e250845e4f842b554d.pdf]

# Structural and computational insights into the SARS-CoV-2 Omicron RBD-ACE2 interaction

Jun Lan<sup>1,\*</sup>, Xinheng He<sup>2,\*</sup>, Yifei Ren<sup>1,6,\*</sup>, Ziyi Wang<sup>1,\*</sup>, Huan Zhou<sup>3</sup>, Shilong Fan<sup>1</sup>, Chenyou Zhu<sup>4</sup>, Dongsheng Liu<sup>4</sup>, Bin Shao<sup>2</sup>, Tie-Yan Liu<sup>2</sup>, Qisheng Wang<sup>3</sup>, Linqi Zhang<sup>5,#</sup>, Jiwan Ge<sup>1,6,#</sup>, Tong Wang<sup>2,#</sup>, Xinquan Wang<sup>1,#</sup>

<sup>1</sup>The Ministry of Education Key Laboratory of Protein Science, Beijing Advanced Innovation Center for Structural Biology, Beijing Frontier Research Center for Biological Structure, Collaborative Innovation Center for Biotherapy, School of Life Sciences, Tsinghua University, 100084 Beijing, China

<sup>2</sup>Microsoft Research Asia, Beijing, China.

<sup>3</sup>Shanghai Synchrotron Radiation Facility, Shanghai Advanced Research Institute, Chinese Academy of Sciences, Shanghai 201204, China

<sup>4</sup>Department of Chemistry, Tsinghua University, 100084 Beijing, China

<sup>5</sup>Center for Global Health and Infectious Diseases, Comprehensive AIDS Research Center, and Beijing Advanced Innovation Center for Structural Biology, School of Medicine, Tsinghua University, Beijing 100084, China

<sup>6</sup>Tsinghua-Peking Center for Life Sciences, Beijing, China

\*These authors contributed equally to this work.

#Correspondence: [zhanglinqi@mail.tsinghua.edu.cn](mailto:zhanglinqi@mail.tsinghua.edu.cn), (L.Z.), [gejw@mail.tsinghua.edu.cn](mailto:gejw@mail.tsinghua.edu.cn) (J. G.), [watong@microsoft.com](mailto:watong@microsoft.com) (T.W.), [xinquanwang@mail.tsinghua.edu.cn](mailto:xinquanwang@mail.tsinghua.edu.cn) (X.W.)

| Omicron RBD - ACE2                                  |                                  |
|-----------------------------------------------------|----------------------------------|
| <b>Data collection</b>                              |                                  |
| Space group                                         | P4 <sub>1</sub> 2 <sub>1</sub> 2 |
| Cell dimensions                                     |                                  |
| a, b, c (Å)                                         | 104.71, 104.71, 227.10           |
| $\alpha$ , $\beta$ , $\gamma$ (°)                   | 90, 90, 90                       |
| Resolution (Å)                                      | 50-2.60(2.66-2.60)               |
| <i>R</i> <sub>merge</sub>                           | 0.26 (2.45)                      |
| <i>I</i> / <i>sI</i>                                | 11.3 (1.3)                       |
| Completeness (%)                                    | 99.77(98.58)                     |
| Redundancy                                          | 14.1 (11.2)                      |
| <b>Refinement</b>                                   |                                  |
| Resolution (Å)                                      | 36.54-2.60                       |
| No. reflections                                     | 39525                            |
| <i>R</i> <sub>work</sub> / <i>R</i> <sub>free</sub> | 19.2/23.1                        |
| No. atoms                                           |                                  |
| Protein                                             | 6440                             |
| Ligand/ion                                          | 96                               |
| Water                                               | 131                              |
| B-factors                                           |                                  |
| Protein                                             | 50.47                            |
| Ligand/ion                                          | 90.06                            |
| Water                                               | 45.36                            |
| R.m.s. deviations                                   |                                  |
| Bond lengths(Å)                                     | 0.008                            |
| Bond angles (°)                                     | 0.93                             |
| Ramachandran                                        |                                  |
| Favored (%)                                         | 96.95                            |
| Allowed (%)                                         | 3.05                             |
| Outliers (%)                                        | 0.00                             |

28 **Extended Data Table 2 | Contact residues of the WT and Omicron RBD-ACE2**  
 29 **interfaces**

| ACE2 | WT RBD                 | Omicron RBD      |
|------|------------------------|------------------|
| S19  |                        | A475, N477       |
| Q24  | A475, N487             | A475, N477, N487 |
| T27  | F456, A475, Y489       | F456, Y489       |
| F28  | Y489                   | Y489             |
| D30  | K417, F456             |                  |
| K31  | Y489, Q493             | F456, Y489       |
| H34  | Y453, L455, Q493       | Y453, K493, S494 |
| E35  | Q493                   | K493             |
| E37  | Y505                   |                  |
| D38  | Y449                   | Y449, S496, R498 |
| Y41  | Q498, T500, N501       | R498, T500, Y501 |
| Q42  | G446, Y449, Q498       | Y449, R498       |
| L79  | F486                   | F486             |
| M82  | F486                   | F486             |
| Y83  | F486, N487, Y489       | F486, N487, Y489 |
| N330 | T500                   | T500             |
| K353 | G496, N501, G502, Y505 | Y501, G502, H505 |
| G354 | G502                   | G502, H505       |
| D355 | T500                   | T500             |
| R357 | T500                   | T500             |
| R393 | Y505                   |                  |

30 A distance cut-off of 4 Å was used.

31

32

33 **Extended Data Table 3 | The hydrogen bonds and salt bridges at the WT and**  
 34 **Omicron RBD-ACE2 interfaces**

|                       | WT RBD    | Length(Å) | ACE2      | Length(Å) | Omicron RBD |
|-----------------------|-----------|-----------|-----------|-----------|-------------|
| <b>Hydrogen bonds</b> |           |           | S19(O)    | 3.2       | N477(ND2)   |
|                       |           |           | S19(OG)   | 3.1       | A475(O)     |
|                       |           |           | S19(N)    | 3.4       | N477(OD1)   |
|                       | N487(ND2) | 2.6       | Q24(OE1)  | 2.8       | N487(ND2)   |
|                       | K417(NZ)  | 3.0       | D30(OD2)  |           |             |
|                       |           |           | H34(ND1)  | 2.9       | Y453(OH)    |
|                       | Q493(NE2) | 2.8       | E35(OE2)  | 3.1       | K493(NZ)    |
|                       | Y505(OH)  | 3.2       | E37(OE2)  |           |             |
|                       |           |           | D38(OD1)  | 2.9       | R498(NH1)   |
|                       |           |           | D38(OD1)  | 2.8       | S496(OG)    |
|                       | Y449(OH)  | 2.7       | D38(OD2)  | 2.5       | Y449(OH)    |
|                       | T500(OG1) | 2.6       | Y41(OH)   | 2.6       | T500(OG1)   |
|                       | N501(N)   | 3.7       | Y41(OH)   |           |             |
|                       | G446(O)   | 3.3       | Q42(NE2)  |           |             |
|                       | Y449(OH)  | 3.0       | Q42(NE2)  | 3.4       | Y449(OH)    |
|                       | Y489(OH)  | 3.5       | Y83(OH)   | 3.5       | Y489(OH)    |
|                       | N487(OD1) | 2.7       | Y83(OH)   | 2.4       | N487(OD1)   |
|                       | G502(N)   | 2.8       | K353(O)   | 2.7       | G502(N)     |
|                       | Y505(OH)  | 3.7       | R393(NH2) |           |             |
| <b>Salt bridges</b>   | K417(NZ)  | 3.9       | D30(OD1)  |           |             |
|                       | K417(NZ)  | 3.0       | D30(OD2)  |           |             |
|                       |           |           | E35(OE2)  | 3.1       | K493(NZ)    |
|                       |           |           | D38(OD1)  | 2.9       | R498(NH1)   |
|                       |           |           | D38(OD1)  | 3.7       | R498(NH2)   |

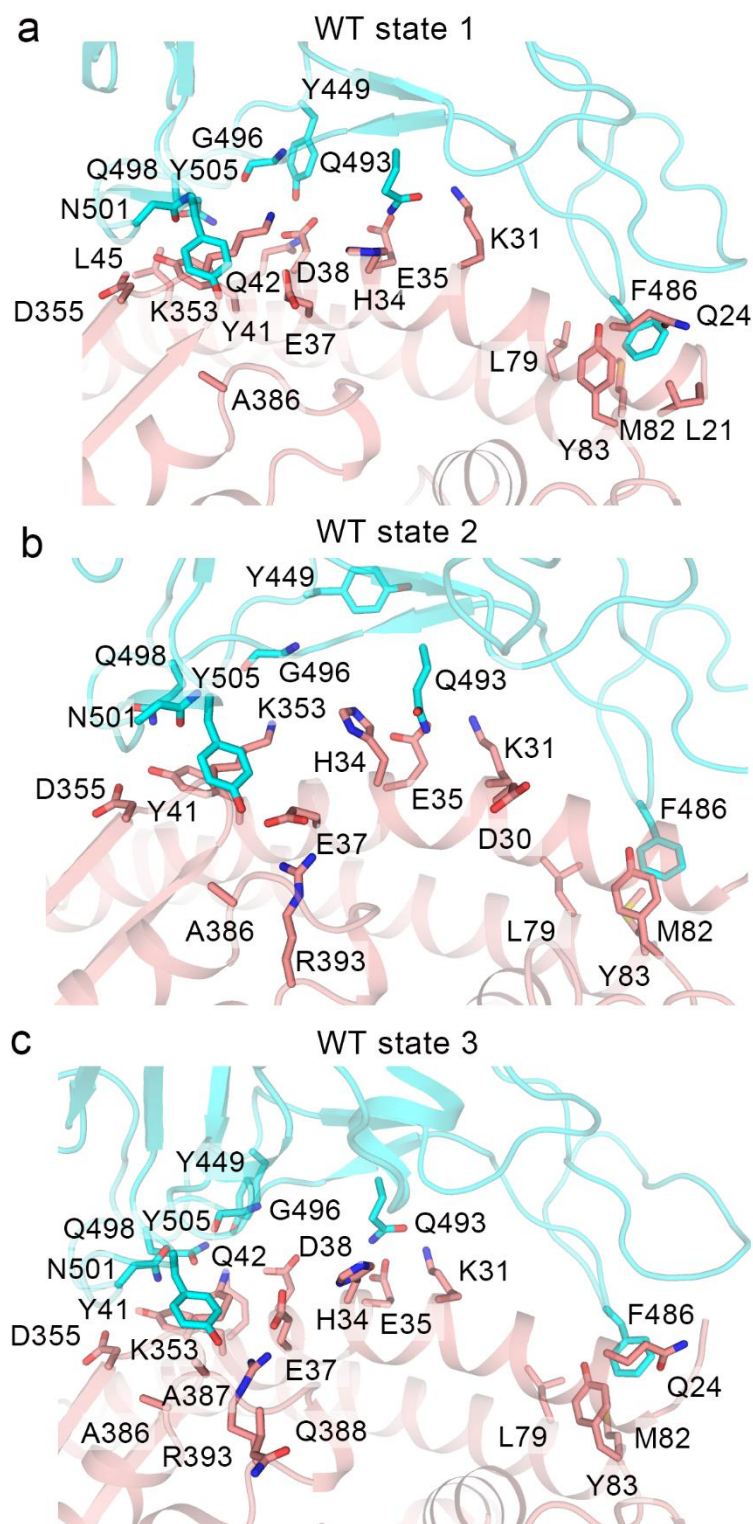

**Extended Data Fig. 1** The interactions between ACE2 and RBD in different WT states. The residues in ACE2 within 5 Å to Y449, F486, Q493, G496, Q498, N501, and Y505 are shown in sticks. The RBD of WT and ACE2 are shown in cyan and salmon, respectively.

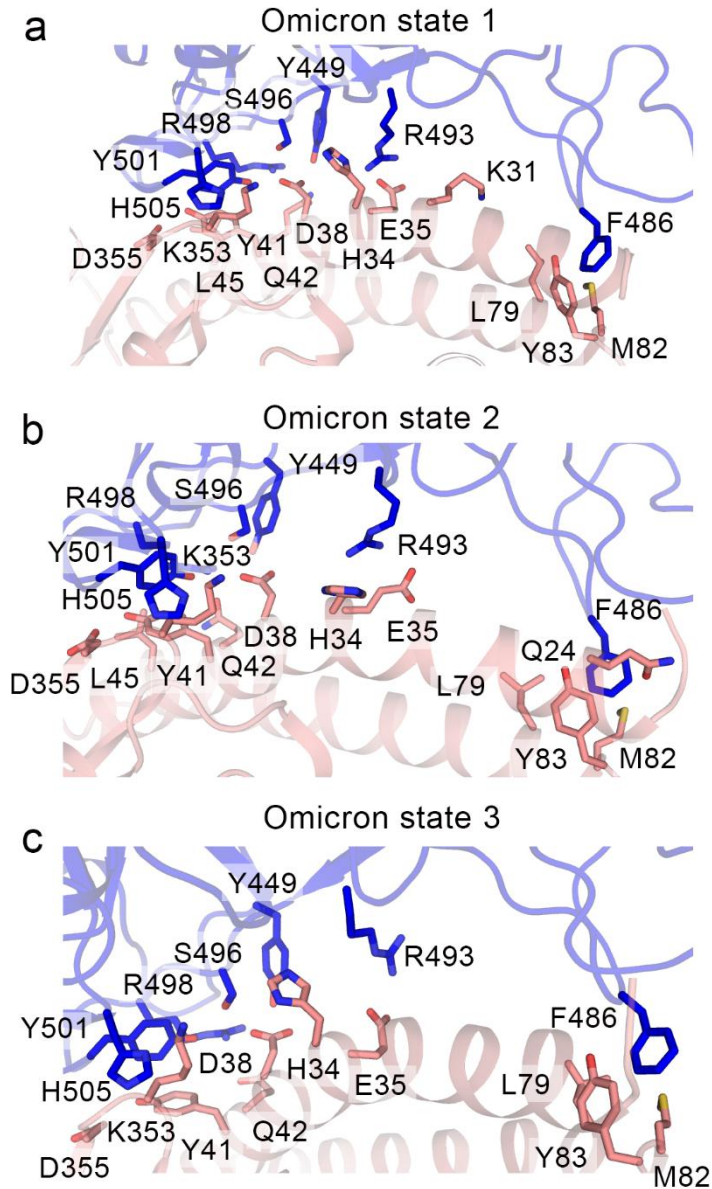

**Extended Data Fig. 2** The interactions between ACE2 and RBD in different Omicron states. The residues in ACE2 within 5 Å to Y449, F486, R493, S496, R498, Y501, and H505 are shown in sticks. The RBD of Omicron and ACE2 are shown in blue and salmon, respectively.

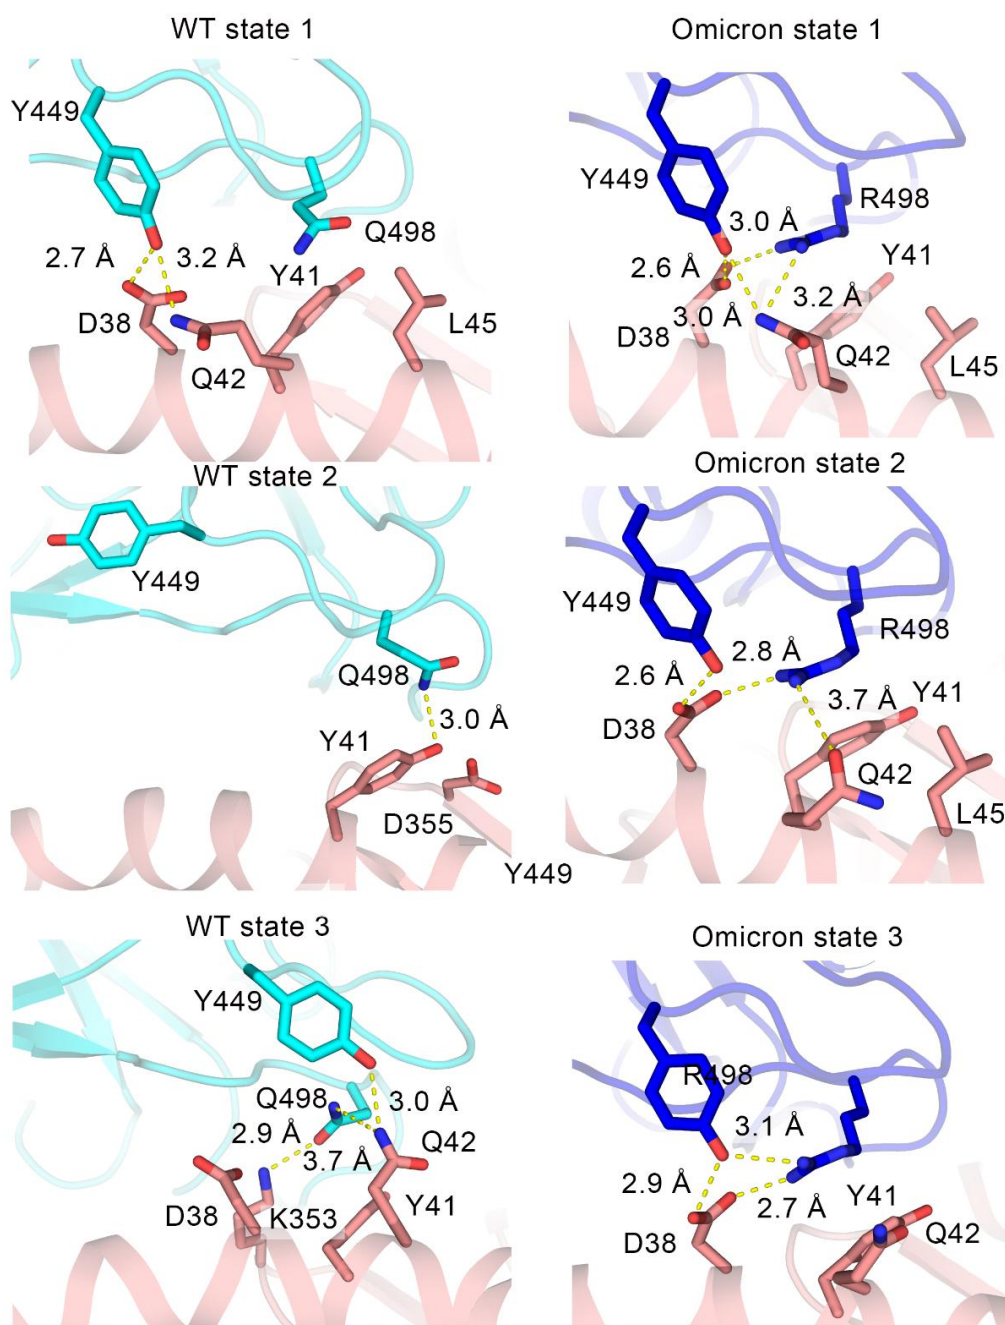

**Extended Data Fig. 3** The interactions between Y449 and Q/R498 of RBD with ACE2 in WT and Omicron systems. The residues in ACE2 within 5 Å to Y449 and Q/R498 are shown in sticks while interactions are shown in yellow dashed lines. The RBD of WT, the RBD of Omicron and ACE2 are shown in cyan, blue and salmon, respectively. In WT system, Y449 shows a unique horizontal pose in state 2 which is unseen in other states. The loss of interactions with D38 and Q42 may lead to the decrease of Y449 contribution in WT state 2. In the Omicron system, however, the hydrogen bond network among D38, Q42 Y449 and R498 reduces the possibility of the horizontal conformation of Y449 and also promotes the interactions between R498 and ACE2. In WT state 3, Q498 interacts with Q42, which similarly promotes its binding affinity ( $\Delta G = -5.43 \pm 2.35$  kcal/mol).



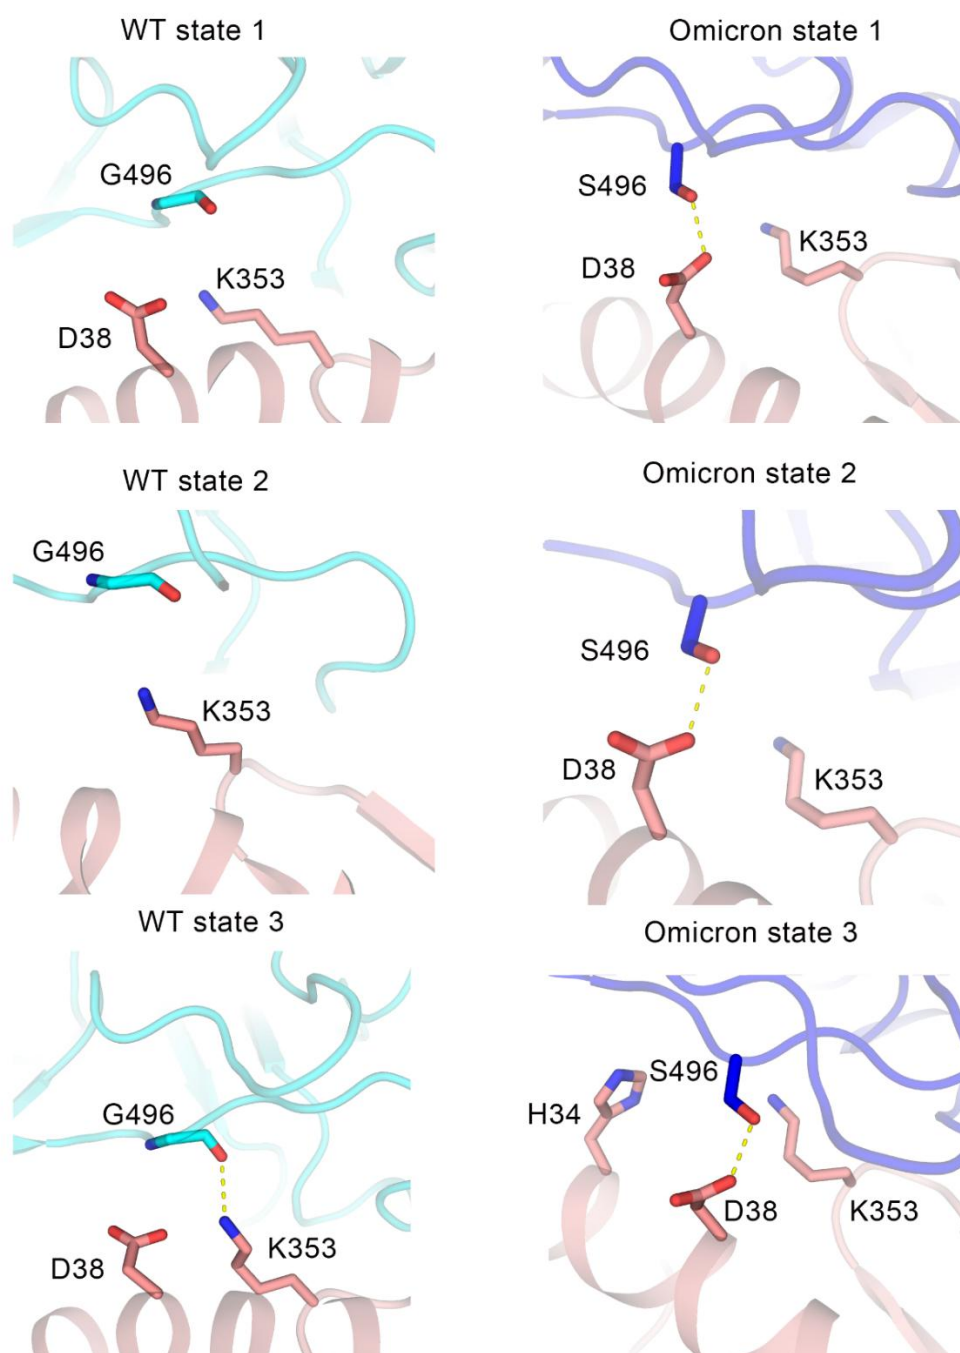

60

61 **Extended Data Fig. 4** The interactions between G/S496 of RBD with ACE2 in WT  
 62 and Omicron systems. The residues in ACE2 within 5 Å to G/S496 are shown in  
 63 sticks while interactions are shown in yellow dashed lines. The RBD of WT, the RBD  
 64 of Omicron and ACE2 are shown in cyan, blue and salmon, respectively. In WT  
 65 system, G496 in state 1 and state 2 show no interaction with ACE2, leading to weak  
 66 contribution to the binding affinity ( $-0.95 \pm 1.18$  and  $-0.01 \pm 0.11$  kcal/mol,  
 67 respectively). As for state 3, G496 interacts with K353 in its main chain, which leads  
 68 to an increase of the binding ability ( $-2.05 \pm 1.11$  kcal/mol). As a contrast, in Omicron  
 69 system, S496 has interaction with D38 in all three macrostates and behaves a lower



binding free energy.

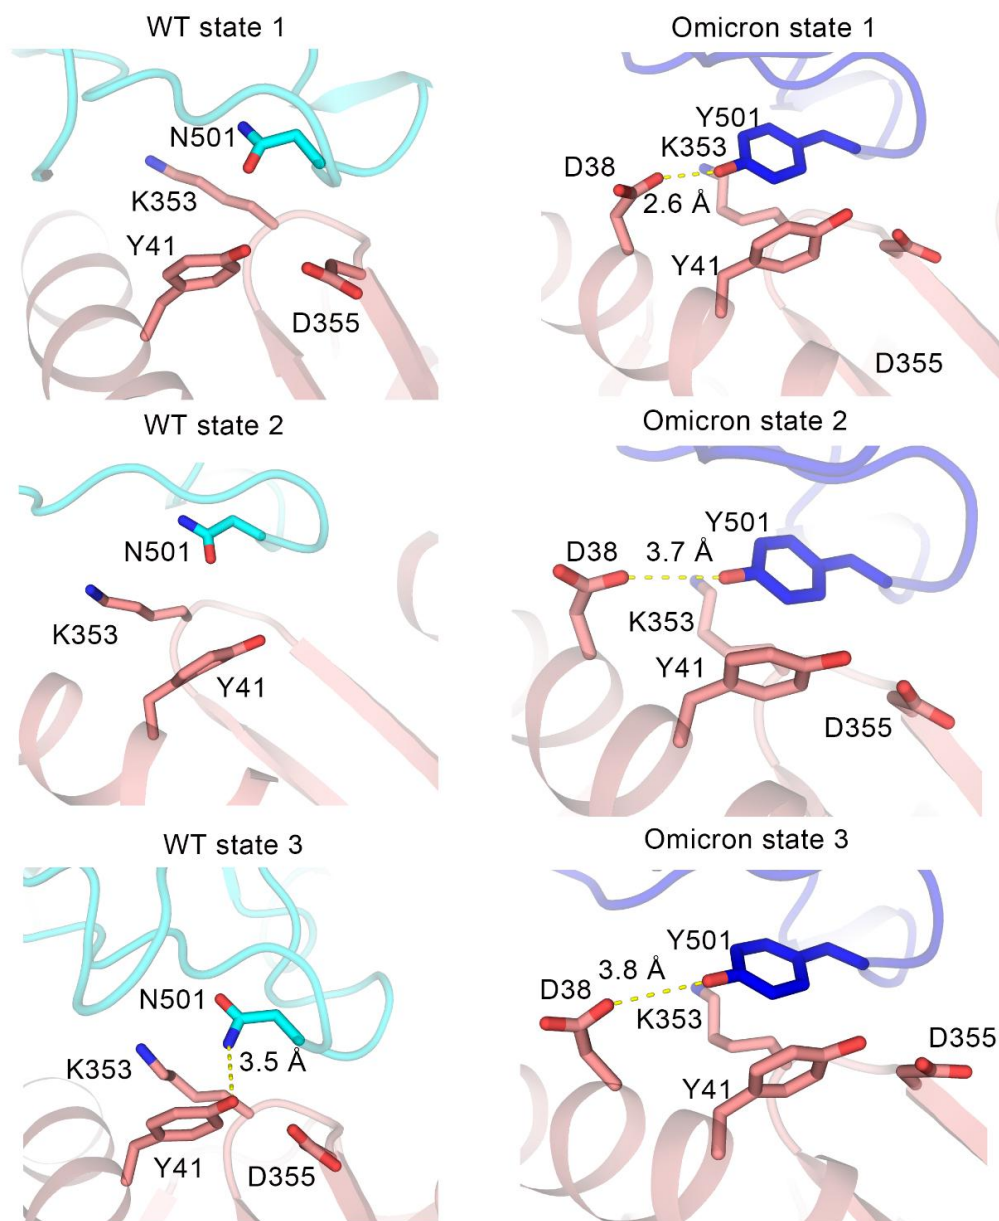

**Extended Data Fig. 5** The interactions between N/Y501 of RBD with ACE2 in WT and Omicron systems. The residues in ACE2 within 5 Å to N/Y501 are shown in sticks while interactions are shown in yellow dashed lines. The RBD of WT, the RBD of Omicron and ACE2 are shown in cyan, blue and salmon, respectively. In WT system, N501 also has no interaction with ACE2 in states 1 and 2 and shows weak energy contribution ( $-1.14 \pm 0.79$  and  $-0.74 \pm 0.77$  kcal/mol, respectively). Even in WT state 3, the energy does not decrease too much with the hydrogen bond to Y41 ( $-2.61 \pm 1.28$  kcal/mol). This phenomenon may be caused by the hydrophilic sidechain of N501 embedded in a hydrophobic environment made by the sidechains of K353 and Y51. As N501Y changes to a residue with a longer sidechain and a hydrophobic phenyl ring in Omicron system, the interaction with D38 is stable in each macrostate

85 and the ring of tyrosine is suitable in the hydrophobic environment.
